# Supplementary material for: Mercury Biogeochemical Cycle in Yanwuping Hg Mine and Source Apportionment by Hg Isotopes
Source: MDPI journal article supplement (doi:10.3390/toxics11050456), 2023-05-14
Supplement: s1 [file s1]

## Supplementary materials (S1)

Mercury biogeochemical cycle in Yanwuping Hg mine and source apportionment  
by Hg isotopes

Xingang Jin <sup>1</sup>, Junyao Yan <sup>2</sup>, Muhammad Ubaid Ali <sup>2</sup>, Qiuhua Li <sup>1,\*</sup> and Ping Li <sup>2,\*</sup>

<sup>1</sup>Key Laboratory for Information System of Mountainous Area and Protection of Ecological  
Environment of Guizhou Province, Guizhou Normal University, Guiyang 550001, China;  
jinxingang0725@foxmail.com

<sup>2</sup> State Key Laboratory of Environmental Geochemistry, Institute of Geochemistry, Chinese  
Academy of Sciences, Guiyang 550081, China; yanjunyao@mail.gyig.ac.cn (J.Y.);  
ubaid@mail.gyig.ac.cn (M.U.A.)

\*Correspondence: qiuhua2002@126.com (Q. L.); liping@mail.gyig.ac.cn (P. L.)

## Supplementary Information

### 1. Supplementary figures

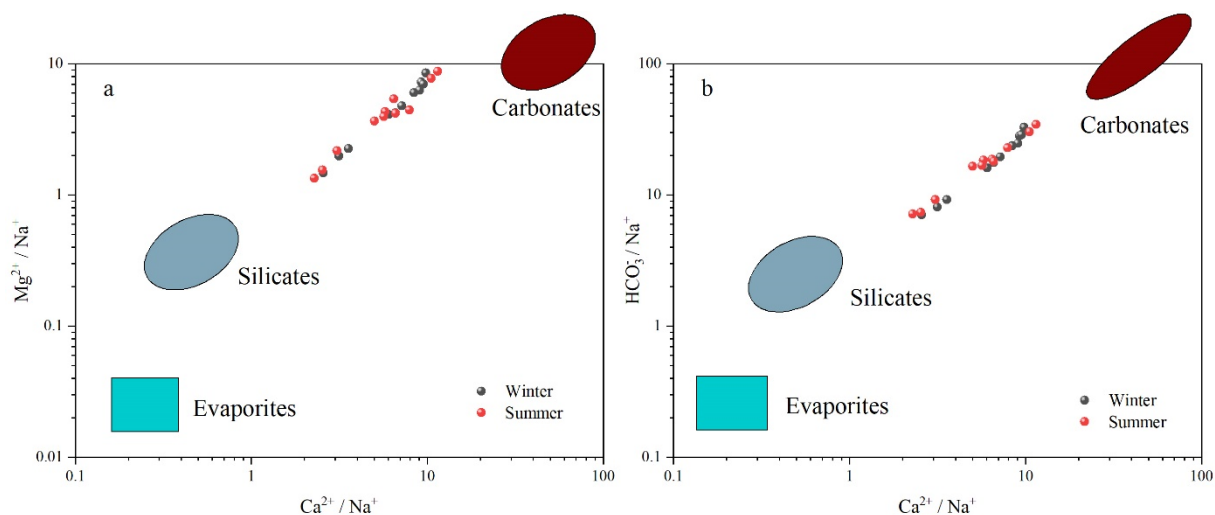

**Figure S1.** Molar ratio bivariate plots of (a)  $\text{Na}^+$ -normalized  $\text{Ca}^{2+}$  and  $\text{Mg}^{2+}$  and (b)  $\text{Na}^+$ -normalized  $\text{Ca}^{2+}$  and  $\text{HCO}_3^-$ . Rock weathering endmembers are cited from Gaillardet et al. [1,2].

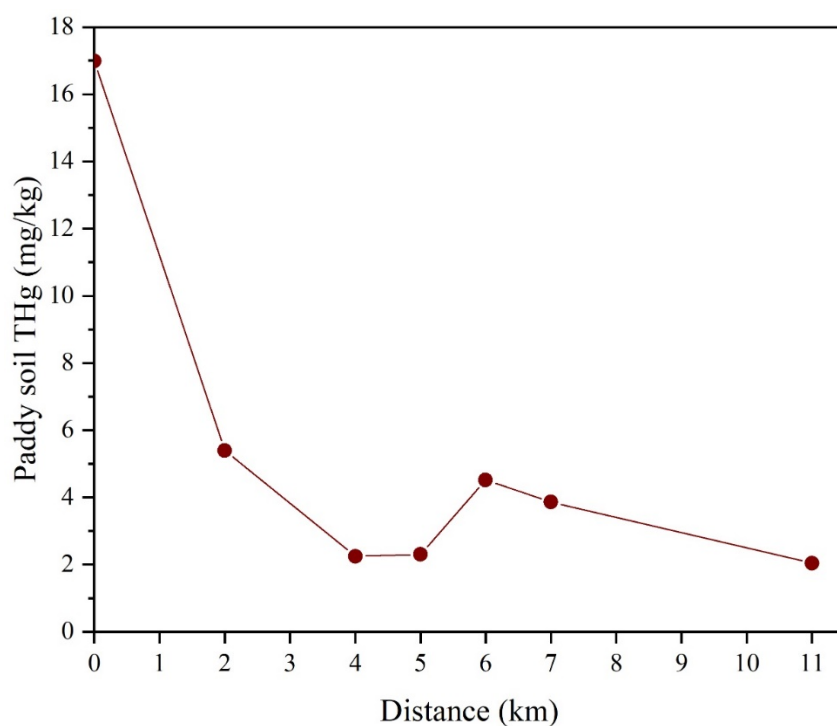

**Figure S2.** Variation of THg with distance in paddy field downstream of YMM.

## 2. Supplementary tables

**Table S1.** Mercury isotopes composition of water samples.

| Sample ID                       | THg (ng/L)           | $\delta^{202}\text{Hg}$ (‰) |      | $\Delta^{199}\text{Hg}$ (‰) |      | $\Delta^{201}\text{Hg}$ (‰) |      |
|---------------------------------|----------------------|-----------------------------|------|-----------------------------|------|-----------------------------|------|
|                                 |                      | Mean                        | SD   | Mean                        | SD   | Mean                        | SD   |
| River water 1<br>DHg            | 37.2                 | -1.25                       | 0.05 | 0.15                        | 0.04 | 0.02                        | 0.04 |
| River water 1<br>PHg            | 1.22×10 <sup>3</sup> | -0.48                       | 0.05 | -0.02                       | 0.04 | -0.07                       | 0.04 |
| River water 2                   | 24.2                 | -0.71                       | 0.05 | 0.04                        | 0.04 | -0.06                       | 0.04 |
| River water 4                   | 10.3                 | -0.14                       | 0.05 | -0.12                       | 0.04 | -0.26                       | 0.04 |
| River water 5                   | 35.7                 | 0.11                        | 0.05 | -0.08                       | 0.04 | -0.10                       | 0.04 |
| River water 6                   | 31.3                 | -0.56                       | 0.05 | 0.06                        | 0.04 | 0.00                        | 0.04 |
| River water 7                   | 9.55                 | -0.22                       | 0.05 | -0.05                       | 0.04 | -0.03                       | 0.04 |
| River water 11                  | 23.4                 | -0.22                       | 0.05 | 0.04                        | 0.04 | -0.05                       | 0.04 |
| Rain water 1                    | 63.3                 | -0.51                       | 0.05 | -0.10                       | 0.04 | -0.09                       | 0.04 |
| Rain water 2                    | 44.0                 | -0.34                       | 0.05 | 0.30                        | 0.04 | 0.19                        | 0.04 |
| Mountain<br>spring water<br>DHg | 6.61                 | -1.57                       | 0.05 | 0.15                        | 0.04 | 0.04                        | 0.04 |
| Mountain<br>spring water<br>PHg | 0.14                 | -1.78                       | 0.05 | -0.03                       | 0.04 | 0.02                        | 0.04 |

**Table S2.** Mercury isotopic composition in soil samples.

| Sample ID                       | THg     | $\delta^{202}\text{Hg}$ (‰) |      | $\Delta^{199}\text{Hg}$ (‰) |      | $\Delta^{201}\text{Hg}$ (‰) |      |
|---------------------------------|---------|-----------------------------|------|-----------------------------|------|-----------------------------|------|
|                                 | (mg/kg) | Mean                        | SD   | Mean                        | SD   | Mean                        | SD   |
| Paddy soil 1-1                  | 2.27    | -0.56                       | 0.05 | 0.01                        | 0.04 | -0.01                       | 0.04 |
| Paddy soil 1-2                  | 8.51    | -0.91                       | 0.05 | 0.04                        | 0.04 | 0.00                        | 0.04 |
| Paddy soil 2                    | 2.31    | -0.82                       | 0.05 | -0.05                       | 0.04 | -0.05                       | 0.04 |
| Paddy soil 3-1                  | 1.49    | -0.64                       | 0.05 | 0.07                        | 0.04 | 0.02                        | 0.04 |
| Paddy soil 3-2                  | 3.29    | -0.80                       | 0.05 | 0.08                        | 0.04 | 0.09                        | 0.04 |
| Paddy soil 3-3                  | 2.13    | -0.72                       | 0.05 | 0.1                         | 0.04 | 0.06                        | 0.04 |
| Paddy soil 4-2                  | 4.96    | -0.67                       | 0.05 | 0.02                        | 0.04 | -0.11                       | 0.04 |
| Paddy soil 4-3                  | 4.01    | -0.90                       | 0.06 | 0.04                        | 0.03 | -0.03                       | 0.02 |
| Paddy soil 5-1                  | 4.55    | -0.73                       | 0.05 | 0.08                        | 0.04 | 0.06                        | 0.04 |
| Paddy soil 5-2                  | 2.29    | -0.58                       | 0.05 | 0.05                        | 0.04 | -0.01                       | 0.04 |
| Paddy soil 5-3                  | 4.92    | -0.73                       | 0.05 | -0.04                       | 0.04 | -0.03                       | 0.04 |
| Paddy soil 6                    | 2.04    | -0.74                       | 0.05 | -0.01                       | 0.04 | -0.05                       | 0.04 |
| Natural<br>background soil 1*   | 1.94    | -1.30                       | 0.06 | 0.00                        | 0.08 | -0.18                       | 0.04 |
| Natural<br>background soil 2*   | 3.17    | -1.21                       | 0.04 | -0.14                       | 0.02 | -0.08                       | 0.02 |
| Total soluble Hg                | 0.03    | -0.90                       | 0.05 | 0.06                        | 0.04 | 0.05                        | 0.04 |
| Calcines                        | 43.8    | -0.35                       | 0.05 | -0.03                       | 0.04 | -0.08                       | 0.04 |
| CC580                           | 131     | -0.47                       | 0.04 | -0.06                       | 0.02 | -0.04                       | 0.02 |
| UM-Almadén<br>standard solution |         | -0.52                       | 0.05 | 0.00                        | 0.04 | -0.02                       | 0.04 |

\* Cited from Song et al. [3].

## References

1. Gaillardet, J.; Dupre, B.; Allegre, C.J.; Negrel, P. Chemical and physical denudation in the Amazon River basin. *Chemical Geology* **1997**, 142, 141-173.
2. Gaillardet, J.; Dupre, B.; Louvat, P.; Allegre, C.J. Global silicate weathering and CO<sub>2</sub> consumption rates deduced from the chemistry of large rivers. *Chemical Geology* **1999**, 159, 3-30.
3. Song, Z.; Wang, C.; Ding, L.; Chen, M.; Hu, Y.; Li, P.; Zhang, L.; Feng, X. Soil mercury pollution caused by typical anthropogenic sources in China: Evidence from stable mercury isotope measurement and receptor model analysis. *Journal of Cleaner Production* **2021**, 288, 125687.
